# Supplementary material for: Taxonomic position of several enigmatic Polyommatus (Agrodiaetus) species (Lepidoptera, Lycaenidae) from Central and Eastern Iran: insights from molecular and chromosomal data
Source: PubMed Central journal article supplement (PMC4296718; doi:10.3897/compcytogen.v8i4.8939), 2014-12-09

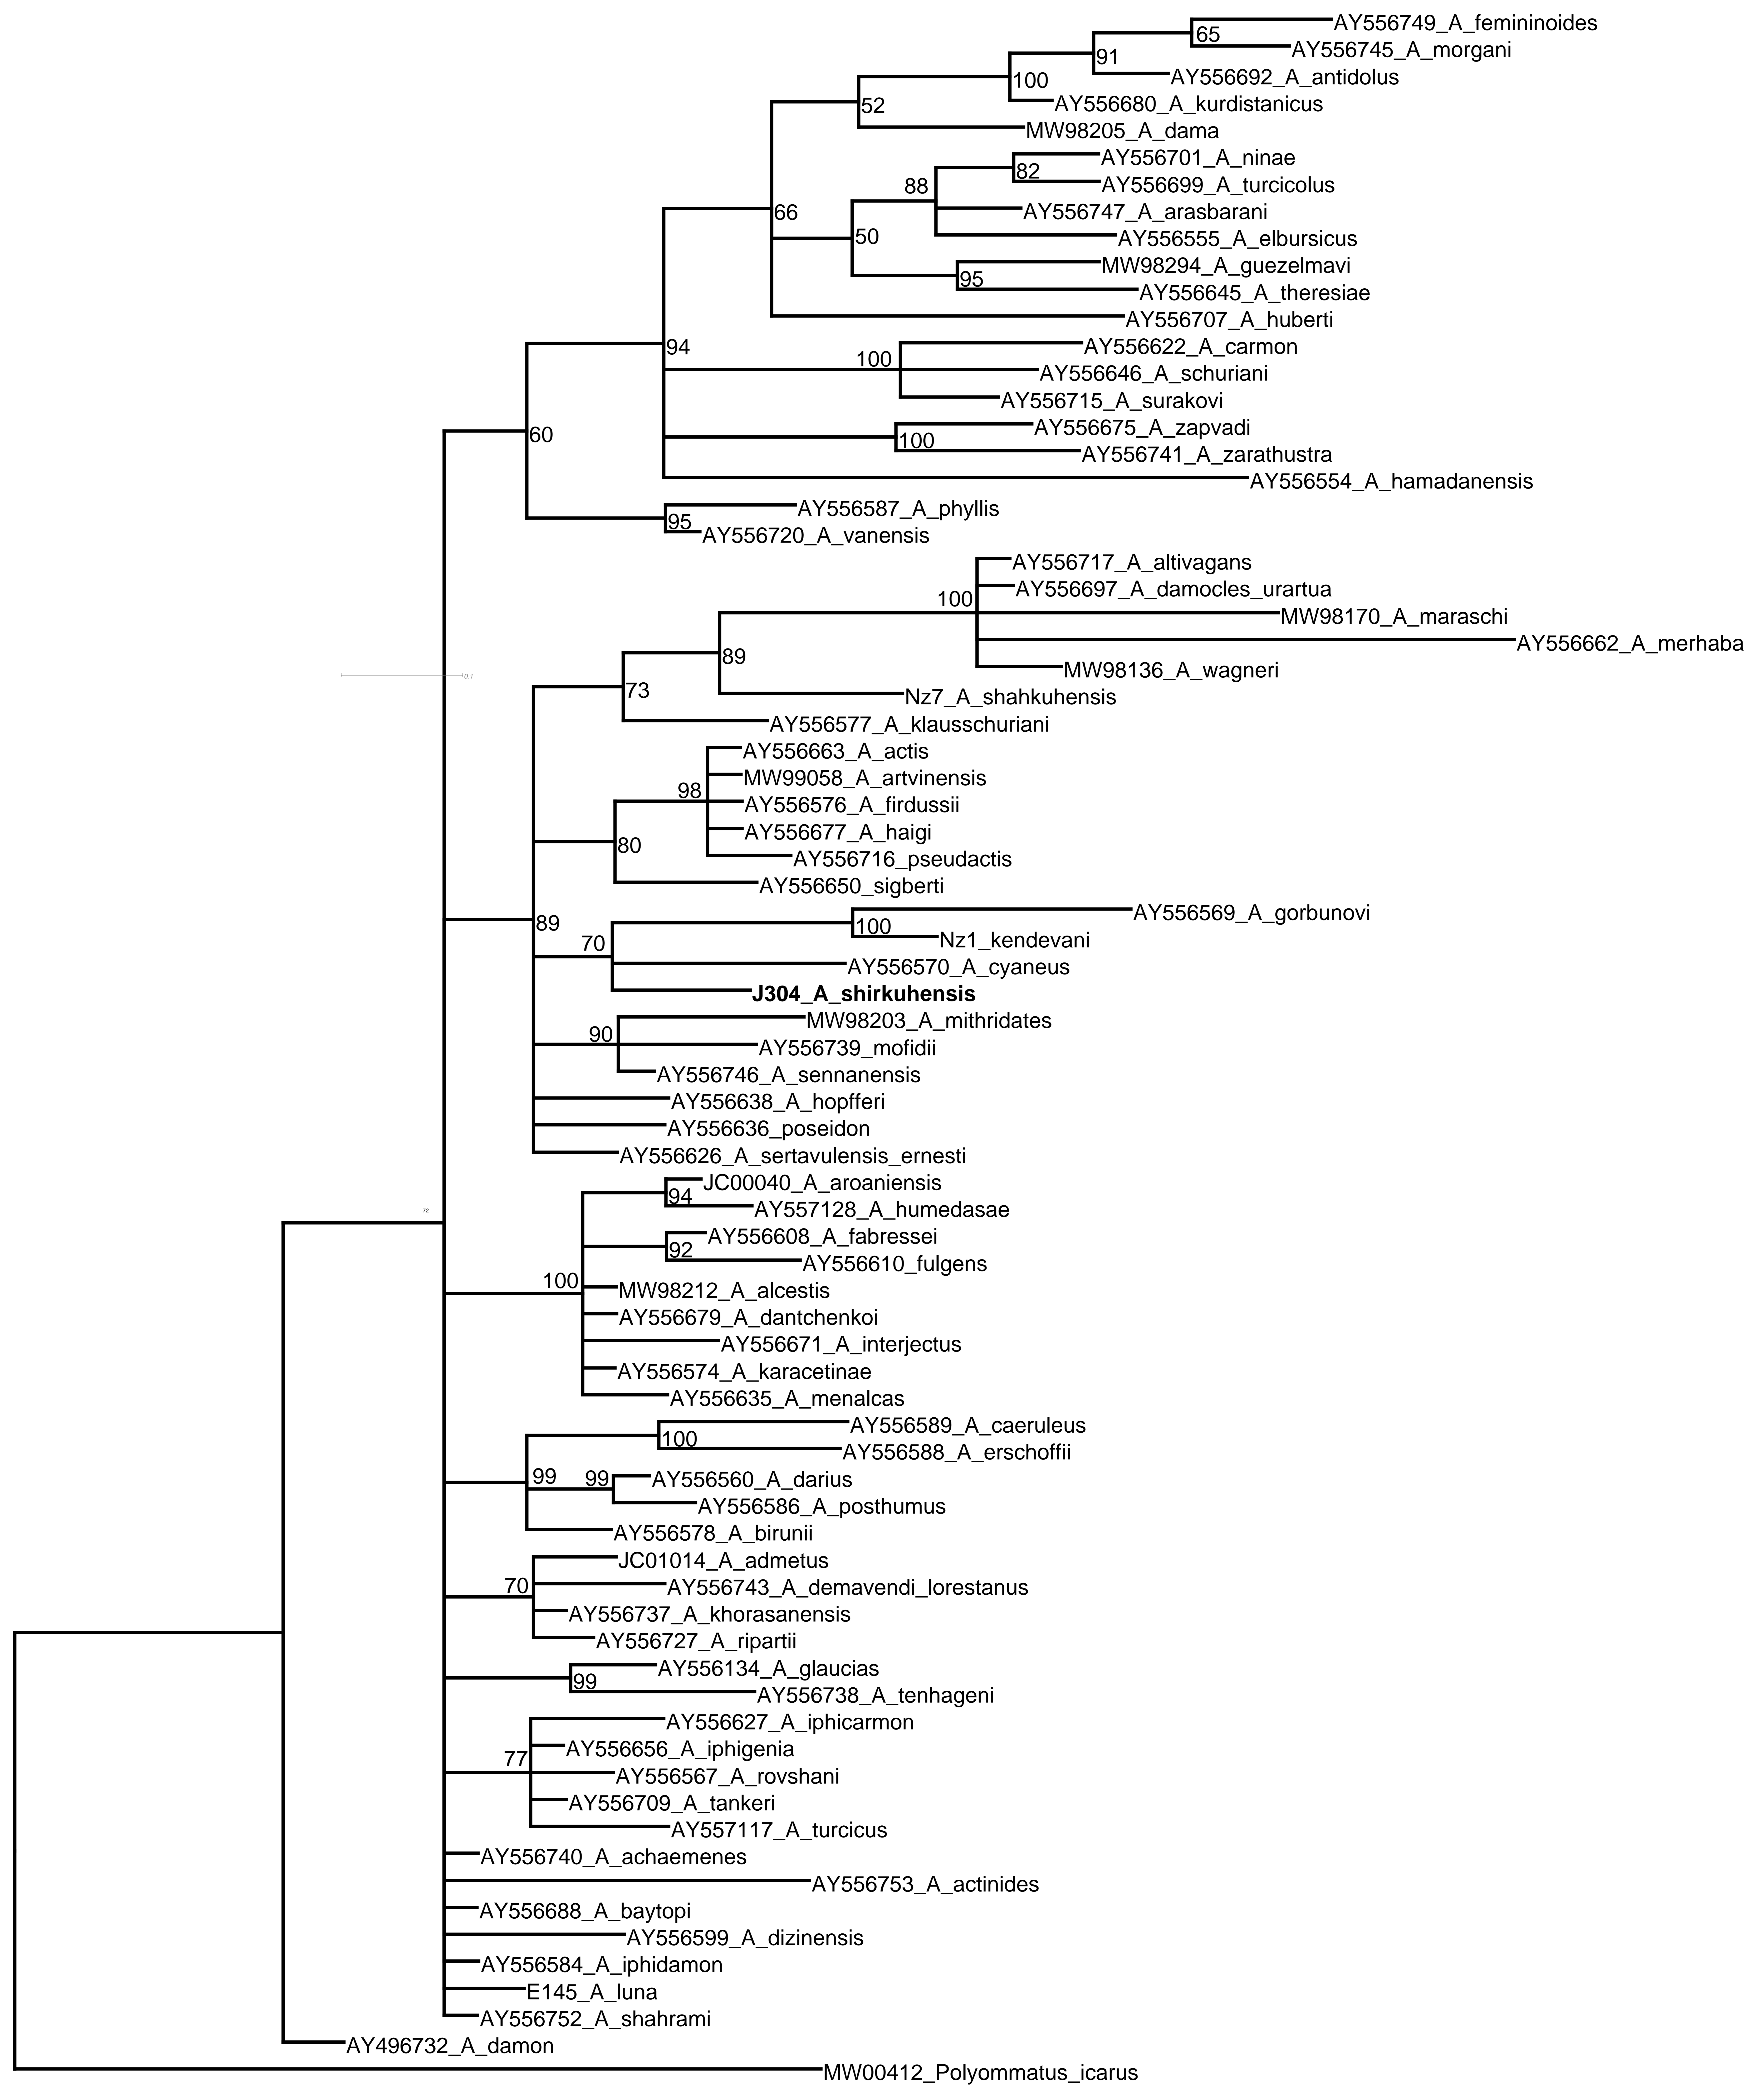

Supplement: CompCytogen-8-313-s002.pdf [file CompCytogen-8-313-s002.pdf]
